# Supplementary material for: Confirmation of Connexin45 Underlying Weak Gap Junctional Intercellular Coupling in HeLa Cells
Source: MDPI journal article supplement (doi:10.3390/biom10101389), 2020-09-29

**File S1.** The cell line authentication of HeLa, *GJC1* KO-HeLa, A549, and *GJA1* KO-A549 cells. Korean Cell Line Bank analyzed the STR profile of the cells using STR kit described below.

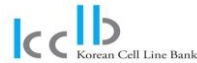

## STR Profile Results

| Sample              | D8S1179 | D21S11 | D7S820 | CSF1PO | D3S1358 | TH01  | D13S317 | D16S539 |
|---------------------|---------|--------|--------|--------|---------|-------|---------|---------|
| HeLa (ATCC CCL-2)   | 12,13   | 27,28  | 8,12   | 9,10   | 15,18   | 7     | 12,14   | 9,10    |
| HeLa                | 12,13   | 27,28  | 8,12   | 9,10   | 15,18   | 7     | 12,14   | 9,10    |
| HeLa-Cx45KO         | 12,13   | 27,28  | 8,12   | 9,10   | 15,18   | 7     | 12,14   | 9,10    |
| A549 (ATCC CCL-185) | 13,14   | 29     | 8,11   | 10,12  | 16      | 8,9,3 | 11      | 11,12   |
| A549                | 13,14   | 29     | 8,11   | 10,12  | 16      | 8,9,3 | 11      | 11,12   |
| A549-Cx43KO         | 13,14   | 29     | 8,11   | 10,12  | 16      | 8,9,3 | 11      | 11,12   |

| Sample              | D2S1338 | D19S433 | Vwa   | TPOX | D18S51 | Amelogenin | D5S818 | FGA   |
|---------------------|---------|---------|-------|------|--------|------------|--------|-------|
| HeLa (ATCC CCL-2)   | 17      | 13,14   | 16,18 | 8,12 | 16     | X          | 11,12  | 18,21 |
| HeLa                | 17      | 13,14   | 16,18 | 8,12 | 16     | X          | 11,12  | 18,21 |
| HeLa-Cx45KO         | 17      | 13,14   | 16,18 | 8,12 | 16     | X          | 11,12  | 18,21 |
| A549 (ATCC CCL-185) | 24      | 13      | 14    | 8,11 | 14,17  | X,Y        | 11     | 23    |
| A549                | 24      | 13      | 14    | 8,11 | 14,17  | X,Y        | 11     | 23    |
| A549-Cx43KO         | 24      | 13      | 14    | 8,11 | 14,17  | X,Y        | 11     | 23    |

STR Kit : AmpliFLSTR identifier PCR Amplification kit (Applied Biosystems, Foster, CA, cat.432288)

Analysis Methods : 3530xL DNA Analyzer (Applied Biosystems, Foster, CA)

: GeneMapper v5 (Applied Biosystems, Foster, CA)

The Fingerprinting of cell lines by 'AmpliFLSTR identifier PCR Amplification kit' was tested on July 29, 2020.

Korean Cell Line Bank  
Cancer Research Institute  
Seoul National University College of Medicine  
Seoul, Korea  
<http://cellbank.snu.ac.kr>  
Tel : 82-2-3668-7915, Fax : 82-2-742-0021

Ja-Lok Ku, D.V.M, Ph.D.  
Curator  
Korean Cell Line Bank  
E-mail : [kujalok@snu.ac.kr](mailto:kujalok@snu.ac.kr)

# HeLa\_STR results

2020.07.29

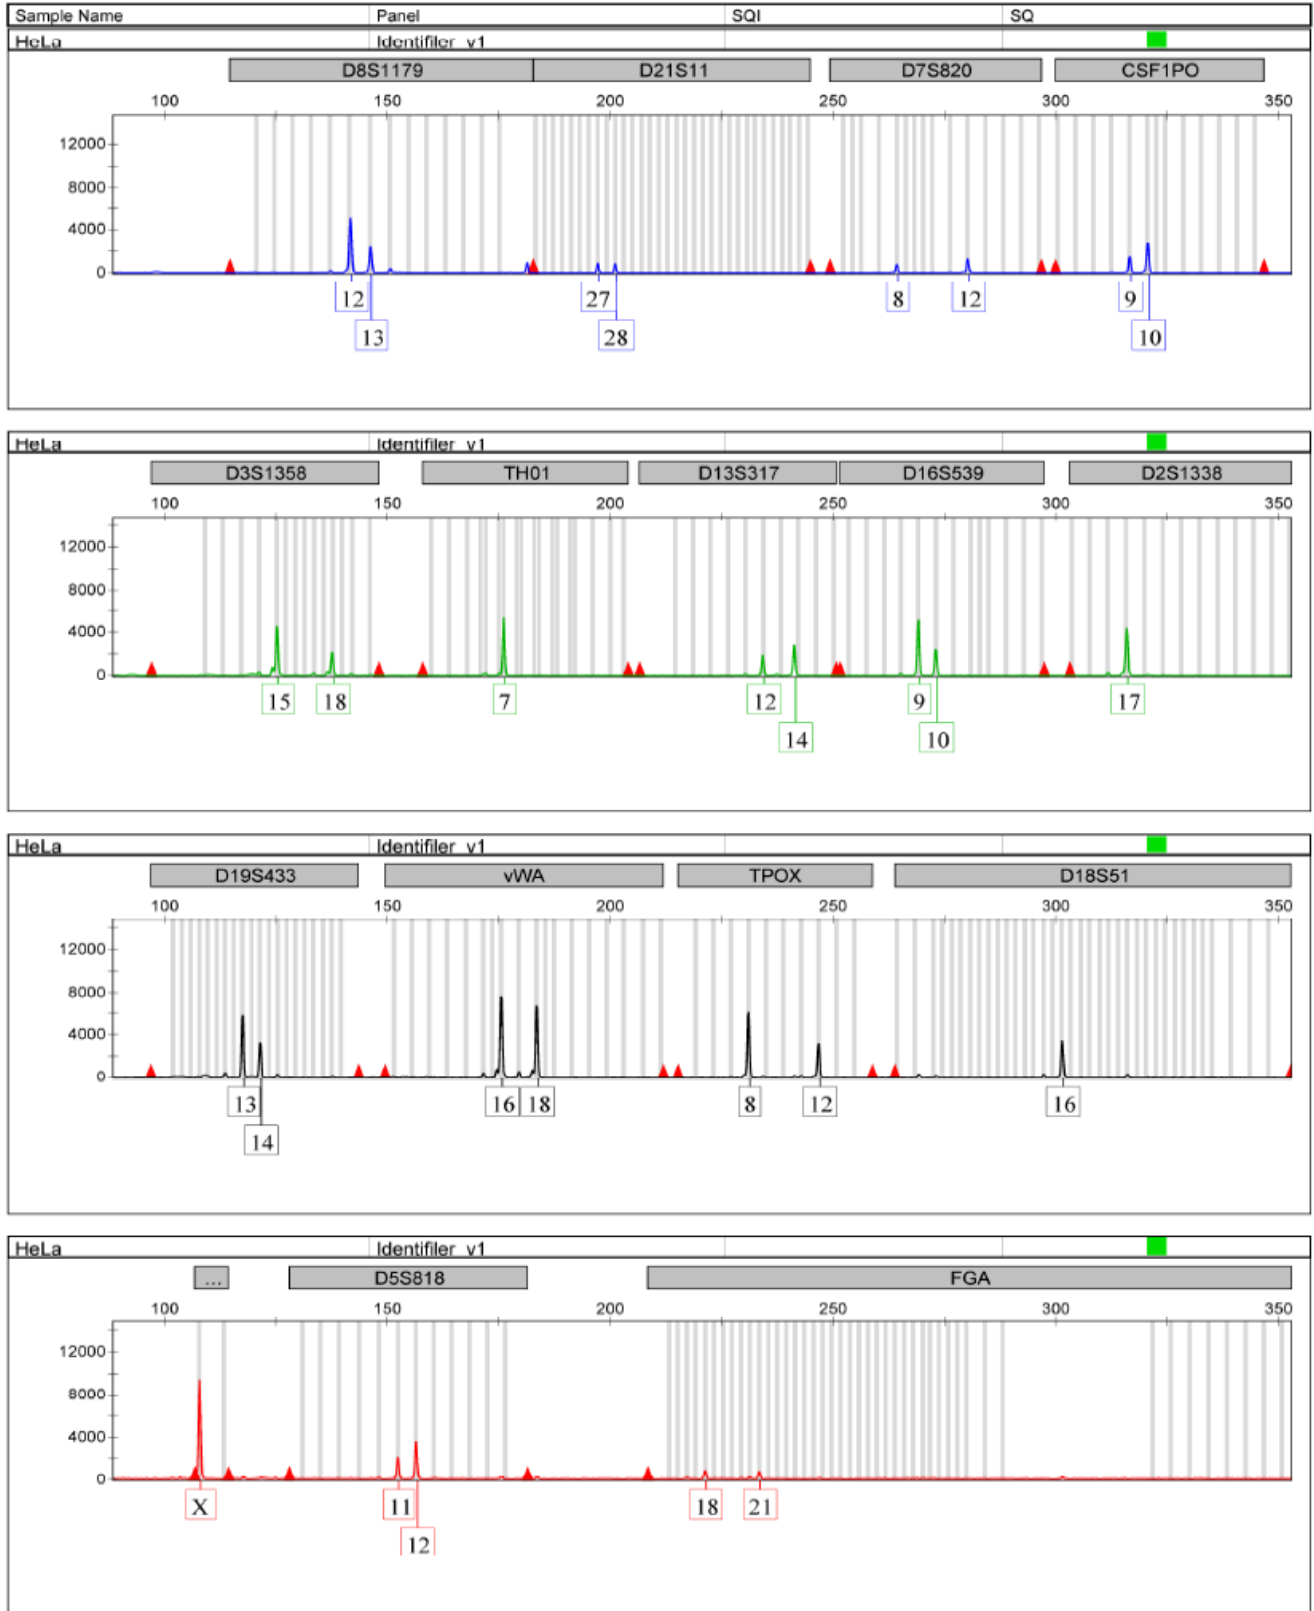

# HeLa-Cx45KO\_STR results

2020.07.29

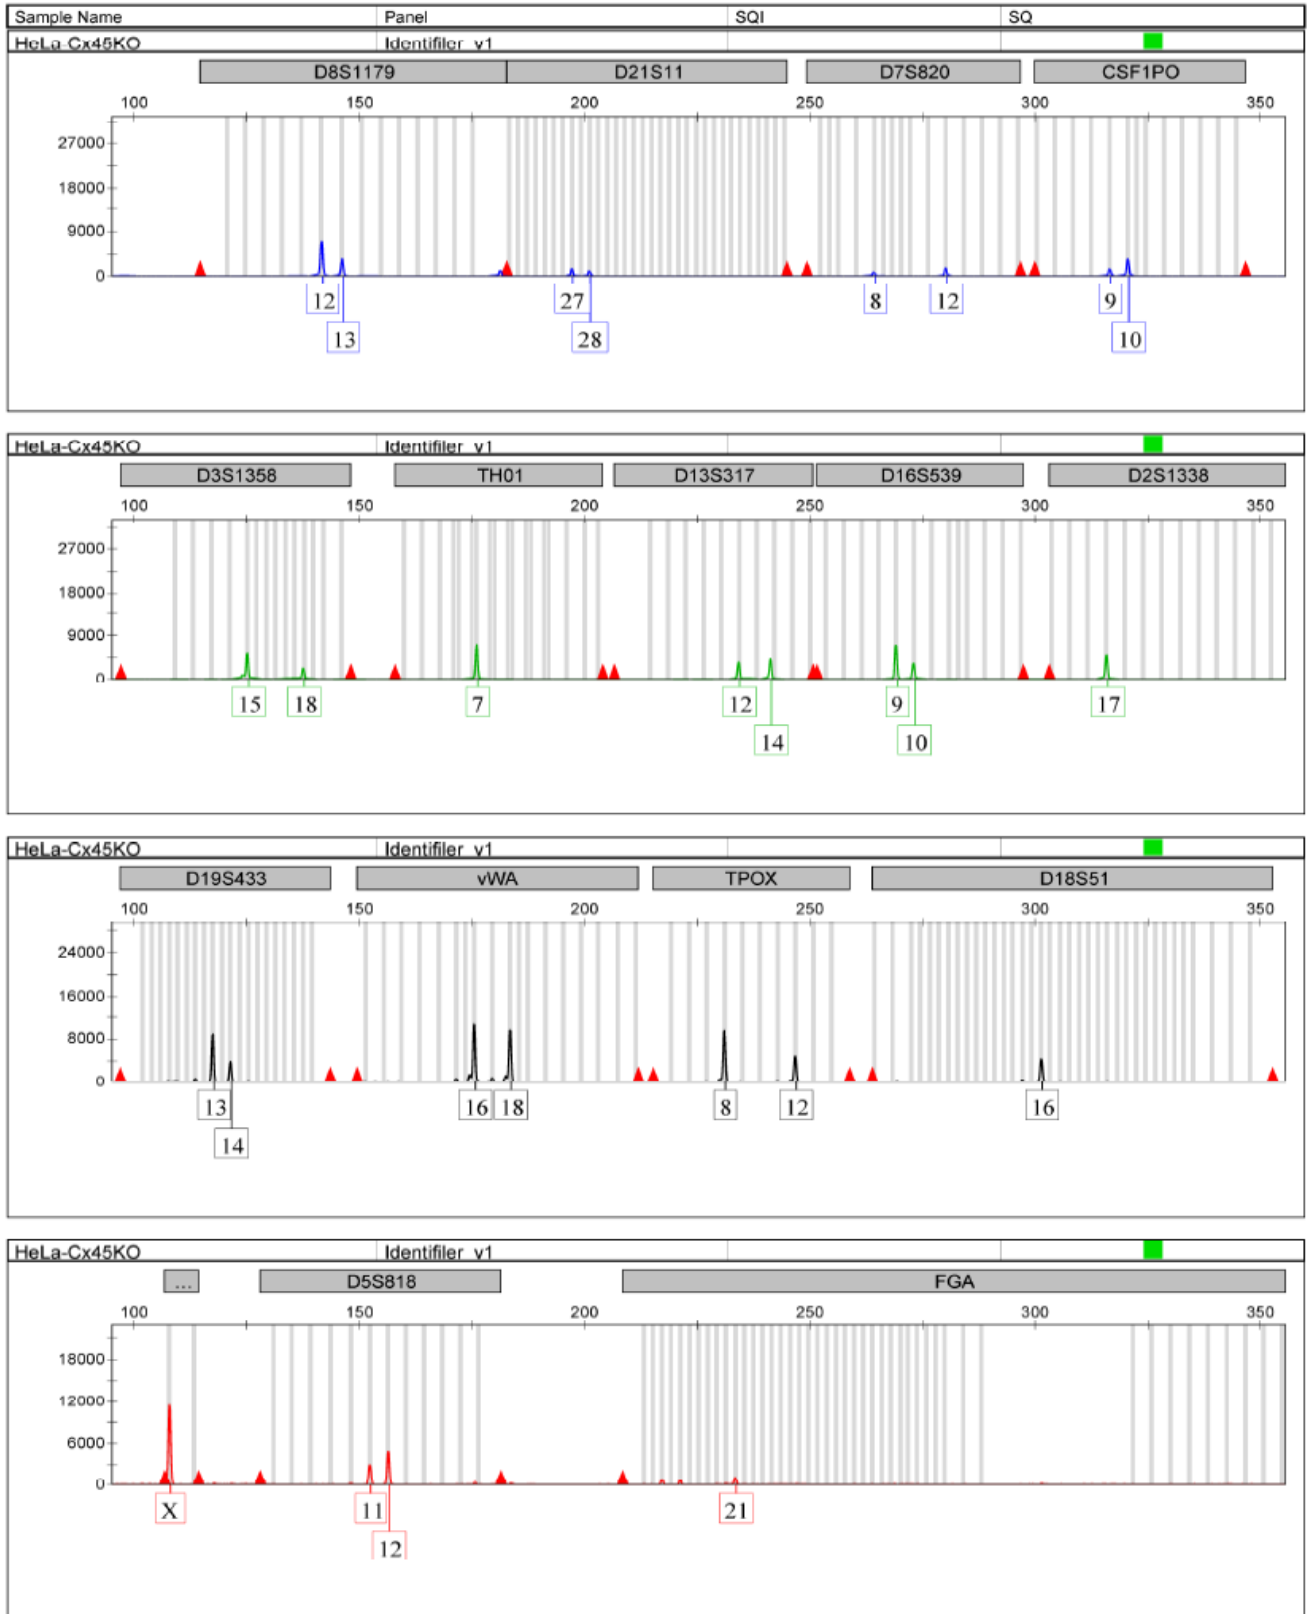

A549\_STR results

2020.07.29

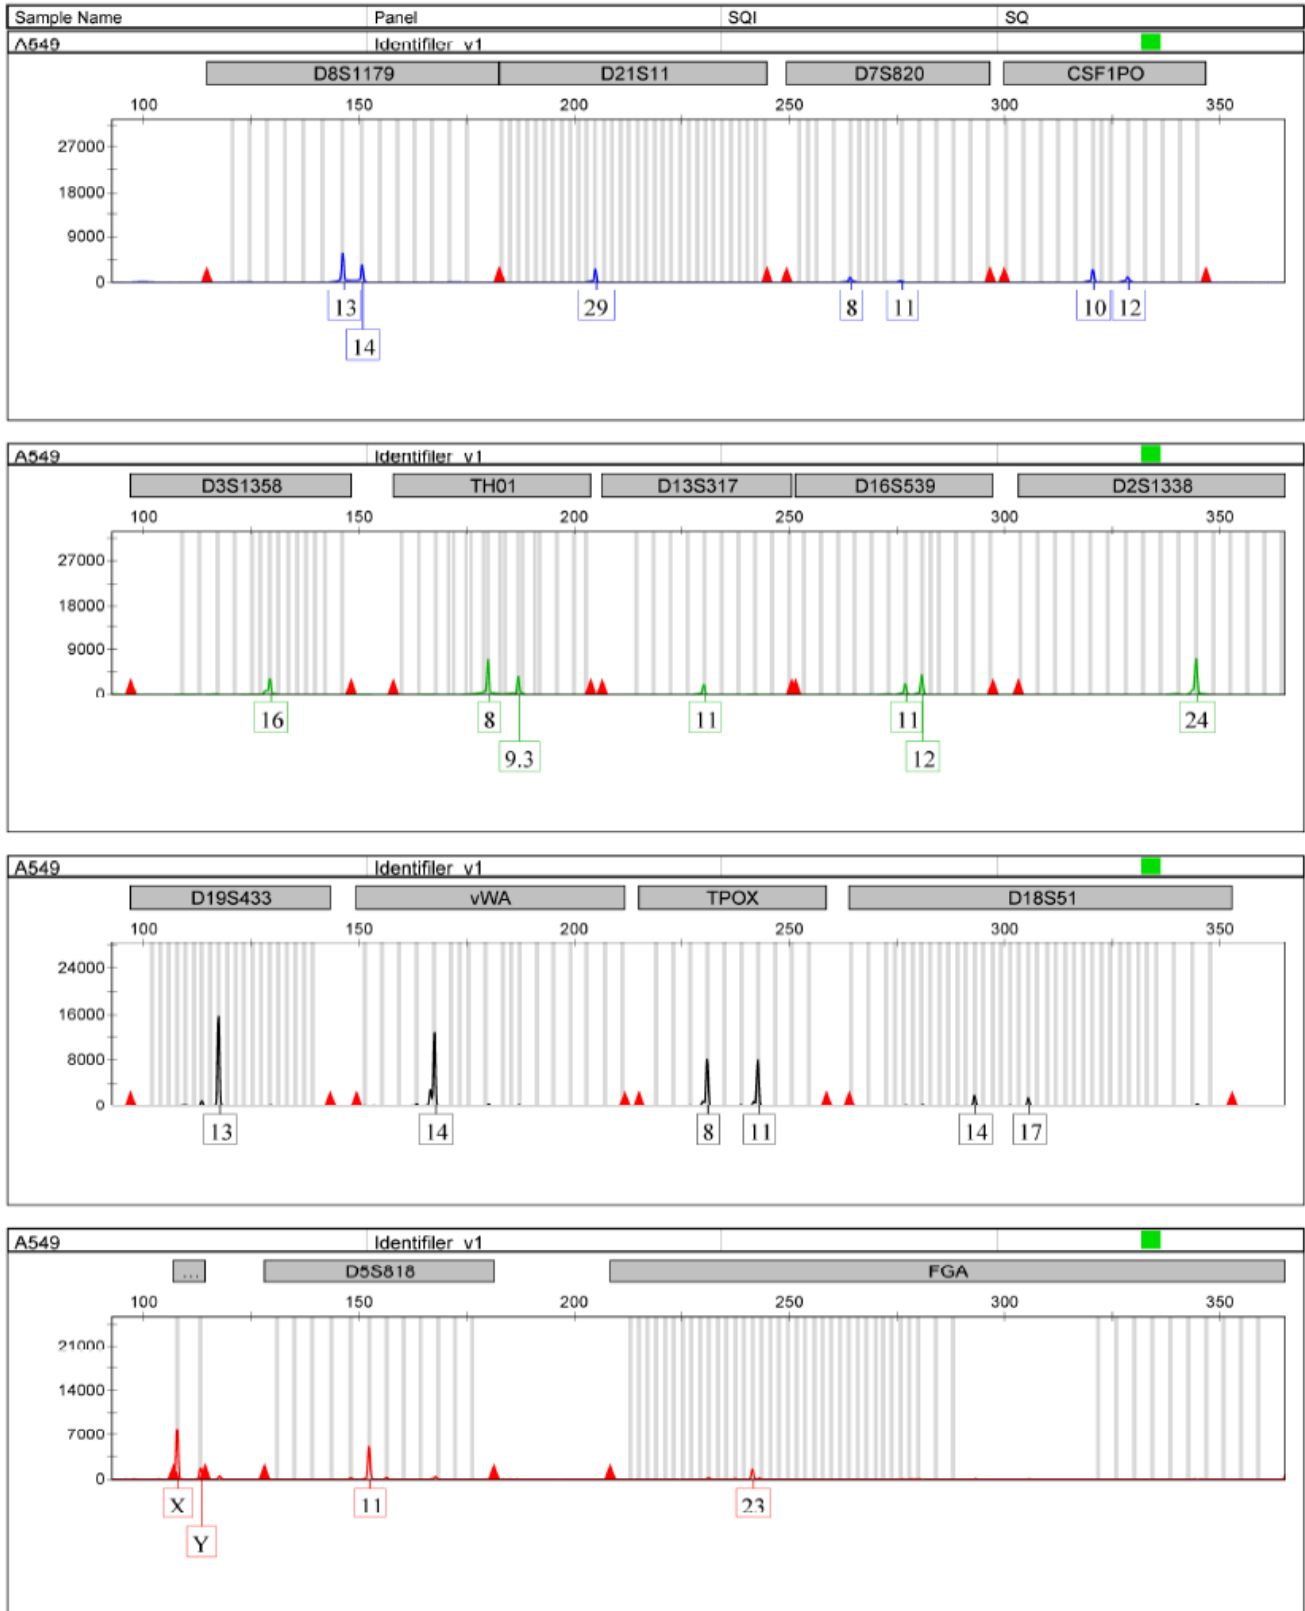

A549\_Cx43KO\_STR results

2020.07.29

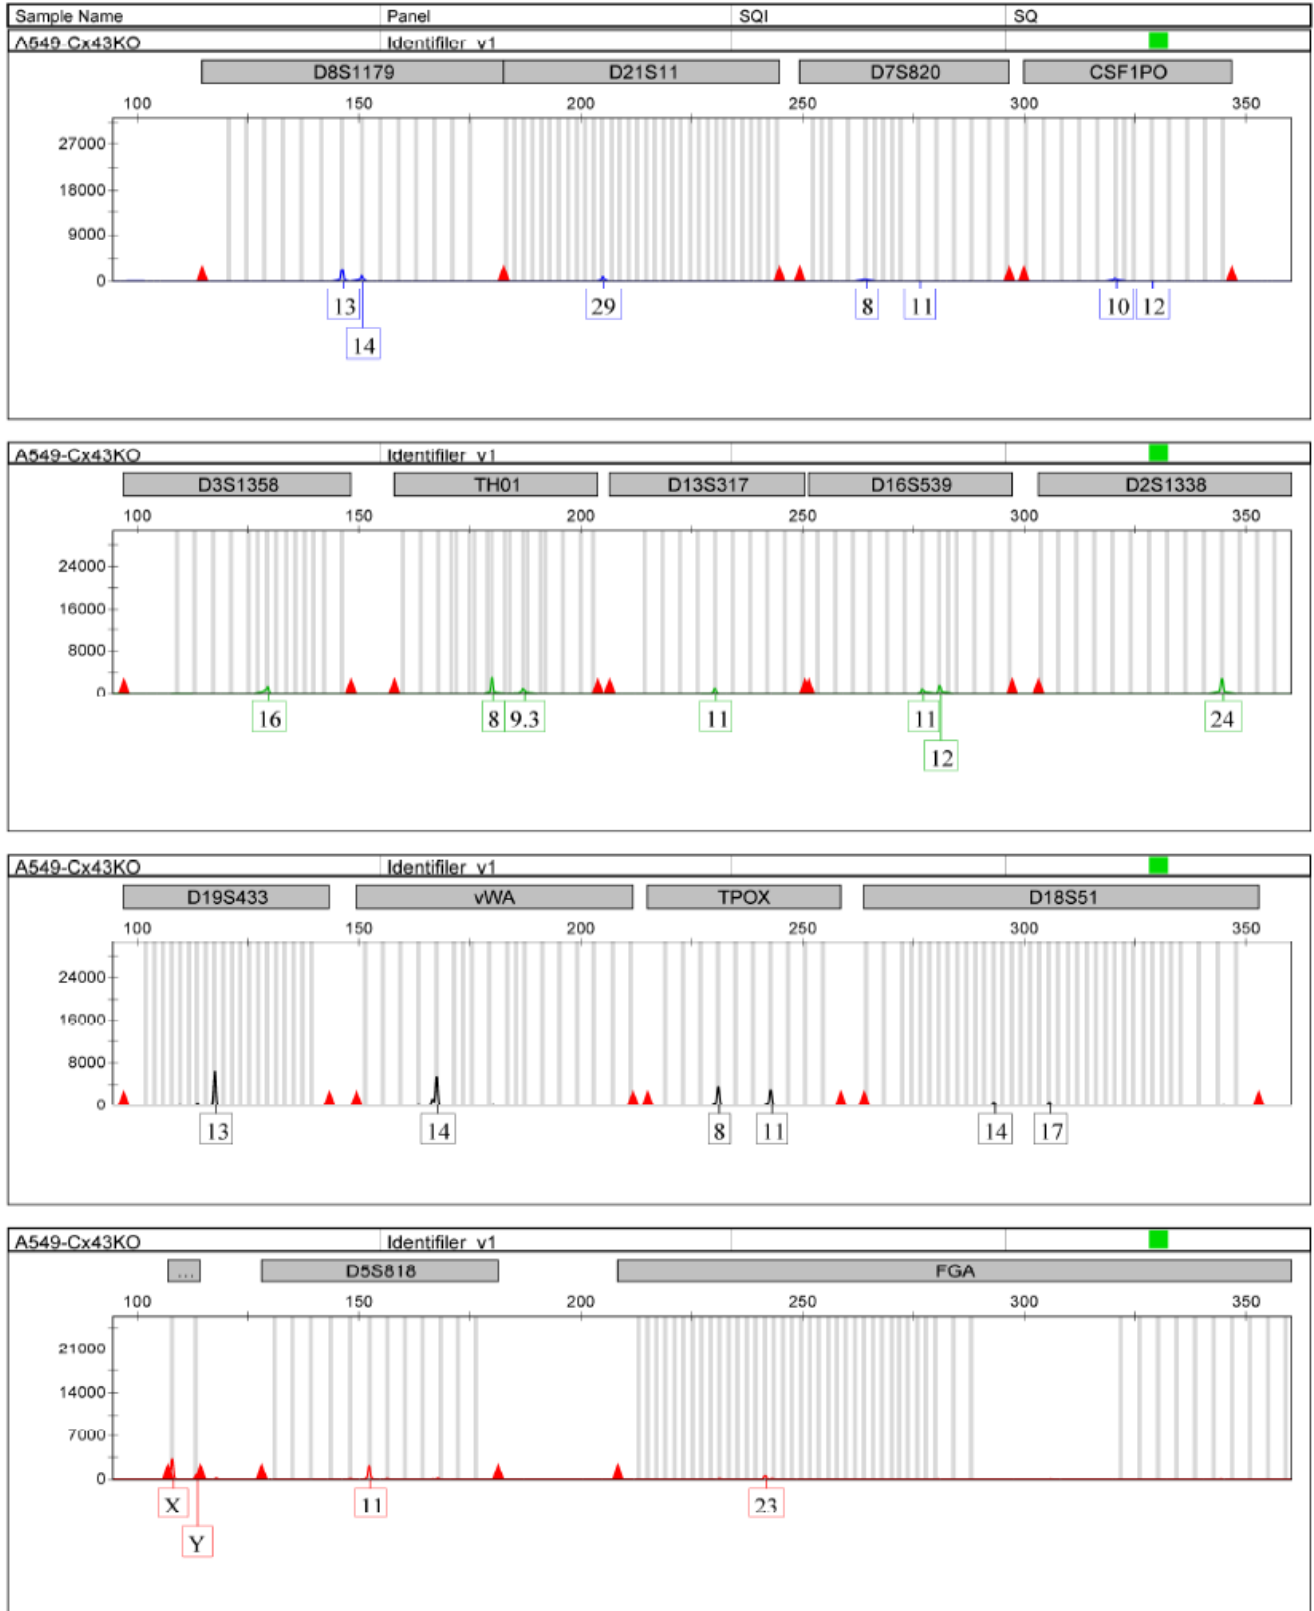

Supplement: s1 [file s1]
