# Supplementary material for: Confirmation of Connexin45 Underlying Weak Gap Junctional Intercellular Coupling in HeLa Cells
Source: MDPI journal article supplement (doi:10.3390/biom10101389), 2020-09-29
Supplement: s1 [file s1]

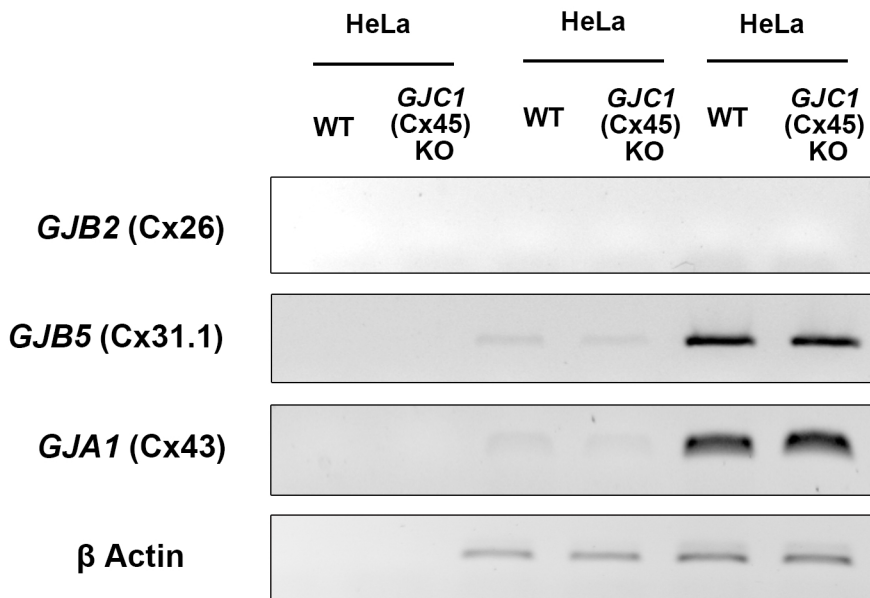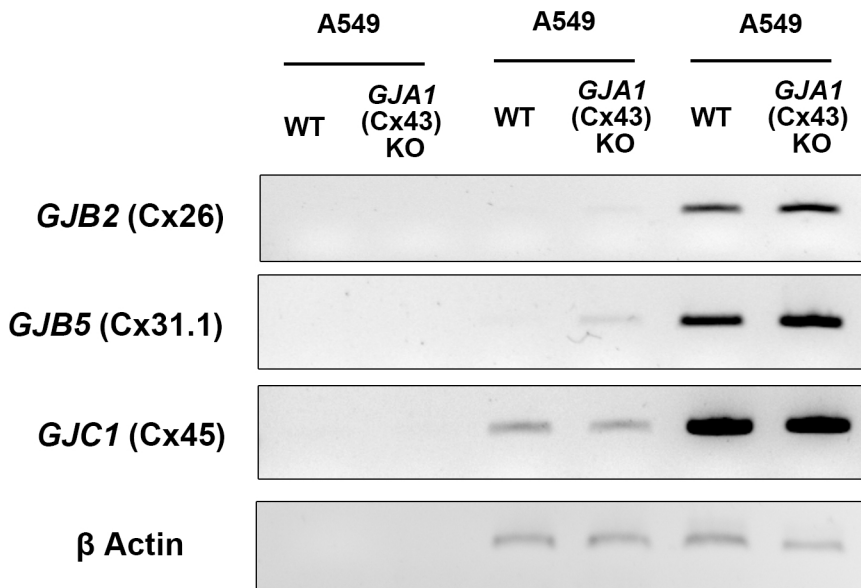

**File S7.** RT-PCR results at different PCR cycles. Cx genes were PCR-amplified with 25 (lane 1 and 2), 30 (lane 3 and 4), and 35 (lane 5 and 6) cycles. Beta actin was amplified with 15 (lane 1 and 2), 20 (lane 3 and 4), and 25 (lane 5 and 6) cycles.
