# Supplementary material for: Confirmation of Connexin45 Underlying Weak Gap Junctional Intercellular Coupling in HeLa Cells
Source: MDPI journal article supplement (doi:10.3390/biom10101389), 2020-09-29
Supplement: s1 [file s1]

**File S5.** Alignment of *GJA1* cDNA and *GJA1P1* that shows the residues that can discriminate the two sequences. The residues without vertical line are mismatches between them. Despite three mismatches in the PCR primer pair, *GJA1P1* was amplified by the primers (File S4). The amplicon only from *GJA1P1* can be digested by ApeI.

Accession No. of *GJA1* and *GJA1P1* are NM\_000165.5 and NG\_003029.5, respectively.

Yellow, *GJA1* F and R primer binding sites; Gray, residues that mismatch PCR primers; Cyan, ApeI site

|        |     |                                                               |     |
|--------|-----|---------------------------------------------------------------|-----|
| GJA1   | 1   | AAAAGCTTTTACGAGGTATCAGCACTTTTCTTTTCATTAGGGGGAAGGCGTGAGGAAAGTA | 60  |
| GJA1P1 | 1   | A--GCTTTTACGAGGTATCAGCACTTTTCTTTTCATT-GGGGGAAGGTGTGAGGAAAGTA  | 56  |
| GJA1   | 61  | CCAAACAGCAGCGGAGTTTTAACTTTAAATAGACAGGTCTGAGTGCCTGAACTTGCCTT   | 120 |
| GJA1P1 | 57  | ACAAACAGCAGCGGAGTTTTAACTTTAAATAGACAGGTCTGAGTGCCTGAATTTGCCTT   | 116 |
| GJA1   | 121 | TTCATTTTACTTCATCCTCCAAGGAGTTCAATCACTTGGCGTGACTTCACTACTTTTAAAG | 180 |
| GJA1P1 | 117 | TTCATTTTACTTCATCCTCCAAGGAGTTCAATCACCTGGCGTGACTTCACTTCTTTTAAAG | 176 |
| GJA1   | 181 | CAAAAGAGTGGTGCCCAAGCAACATGGGTGACTGGAGCGCCTTAGGCCAACTCCTTGACA  | 240 |
| GJA1P1 | 177 | CAAAAGAGTGGTGCCCAAGCAACATGCGTGACTGGAGCACTTAGGCCAACTCCTTGACA   | 236 |
| GJA1   | 241 | AGGTTCAAGCCTACTCAACTGCTGGAGGGAAGGTGTGGCTGTCAGTACTTTTCATTTTCC  | 300 |
| GJA1P1 | 237 | AGGTTCAAGCCTACTTAACTGCTGGAGGGAAGGTGTGGCTGTCAGTACTTTTCATTTTCC  | 296 |
| GJA1   | 301 | GAATCCTGCTGCTGGGGACAGCGGTTGAGTCAGCCTGGGGAGATGAGCAGTCTGCCTTTC  | 360 |
| GJA1P1 | 297 | AAATCCTGCTGCTGAAGACAGTGGTTGAGTCAGCCTGGGGAGATGAGCAGTCTGCCTTTC  | 356 |
| GJA1   | 361 | GTTGTAACACTCAGCAACCTGGTTGTGAAAATGTCTGCTATGACAAGTCTTTCCCAATCT  | 420 |
| GJA1P1 | 357 | GTTGTAACACTCAGCAACCTGGTTGTGAAAATGTCTGCTATGACAAGTCTTTCCCAATCT  | 416 |
| GJA1   | 421 | CTCATGTGCGCTTCTGGGTCTGCAGATCATATTTGTGTCTGTACCCACACTCTTGTACC   | 480 |
| GJA1P1 | 417 | CTCATGTGCGCTTCTGGGTCTGCAGATCATATTTGTGTCTGTACCCATACTCTTGTACC   | 476 |
| GJA1   | 481 | TGGCTCATGTGTTCTATGTGATGCGAAAGGAAGAGAACTGAACAAGAAAGAGGAAGAAC   | 540 |
| GJA1P1 | 477 | TGGCTCATGTGTTCTATGTGATGCAAAAGGAAGAGAACTGAACAAGAAAGAGGAGGAAC   | 536 |
| GJA1   | 541 | TCAAGGTTGCCCAAACCTGATGGTGTCAATGTGGACATGCACTTGAAGCAGATTGAGATAA | 600 |
| GJA1P1 | 537 | TCAAGGTTGCCCAAACCTGATGGTGTCAATGTGGAGATGCACTTGAAGCAGATTGAGATAA | 596 |
| GJA1   | 601 | AGAAGTTCAAGTACGGTATTGAAGAGCATGGTAAGGTGAAAATGCGAGGGGGGTTGCTGC  | 660 |
| GJA1P1 | 597 | AGAAGTTCAAGTATGGTATTGAAGAGCATGGTAAGGTGAAAATGCAAGGGGGGTTGCTGC  | 656 |
| GJA1   | 661 | GAACCTACATCATCAGTATCCTCTTCAAGTCTATCTTTGAGGTGGCCTTCTTGCTGATCC  | 720 |
| GJA1P1 | 657 | GAACCTACATCATCAGTATCCTCTTCAAGTCTATCTTTGAGGTGACCTT---GCTGATCC  | 713 |
| GJA1   | 721 | AGTGGTACATCTATGGATTTCAGCTTGAGTGCTGTTTACACTTGCAAAAGAGATCCCTGCC | 780 |
| GJA1P1 | 714 | AGTGGTACATCTATGGATTTCAGCTTGAGTGCTGTTTACACTTGCAAAAGAGATCCCTGCC | 773 |
| GJA1   | 781 | CACATCAGGTGGACTGTTTCTCTCTCGCCCCACGGAGAAAACCATCTTCATCATCTTCA   | 840 |
| GJA1P1 | 774 | CACATCAGGTGGACTGCTTCTCTCTTGCCCCATGGAGAAAACCATCTTCATCATCTTCA   | 833 |
| GJA1   | 841 | TGCTGGTGGTGTCTTGGTGTCCCTGGCCTTGAATATCATTGAACTCTTCTATGTTTCT    | 900 |
| GJA1P1 | 834 | TGCTGGTGGTGTCTTGGTGTCCCTGGCCTTGAATATCATTGAACTCTTCTACGTTTCT    | 893 |

|        |      |                                                               |      |
|--------|------|---------------------------------------------------------------|------|
| GJA1   | 901  | TCAAGGGCGTTAAGGATCGGGTTAAGGGAAAGAGCGACCCCTTACCATGCGACCAGTGGTG | 960  |
|        |      |                                                               |      |
| GJA1P1 | 894  | TCAAGGGCGTTAAGGATTGGGTTAAGGGAAAGAGCGACCCCTTACCATGCGACCACTGGCC | 953  |
| GJA1   | 961  | CGCTGAGCCCTGCCAAAGACTGTGGGTCTCAAAAAATATGCTTATTTCAATGGCTGCTCCT | 1020 |
|        |      |                                                               |      |
| GJA1P1 | 954  | CGCTGAGCCCCGCCAAAGACTGTGGGTCTCAAAAAATATGCTTATTTCAATGGCTGCTCCT | 1013 |
| GJA1   | 1021 | CACCAACCGCTCCCCCTCTCGCCTATGTCTCCTCCTGGGTACAAGCTGGTTACTGGCGACA | 1080 |
|        |      |                                                               |      |
| GJA1P1 | 1014 | CACCAACTGCTCCCCCTCTCGCCTATGTCTCTTCCTGGGTACAAGCTGGTTAATGGCGACA | 1073 |
| GJA1   | 1081 | GAAACAATTCTTCTTGCCGCAATTACAACAAGCAAGTGAGCAAAACTGGGGCTAATT     | 1140 |
|        |      |                                                               |      |
| GJA1P1 | 1074 | GAAACAATTCTTCTTGCCGCAATTACGACAAGCAAGTGAGCAAAACTGGGGCTAATT     | 1133 |
| GJA1   | 1141 | ACAGTGCAGAACAAAATCGAATGGGGCAGGCGGGAAGCACCATCTCTAACTCCCACGCAC  | 1200 |
|        |      |                                                               |      |
| GJA1P1 | 1134 | ACAGTGCAGAACAAAATCGAATGGGGCAGGCGGGAAGCACCATCTCTAACTCCCACGCAC  | 1193 |
| GJA1   | 1201 | AGCCTTTTGATTTCCCCGATGATAACCAGAATTCTAAAAAACTAGCTGCTGGACATGAAT  | 1260 |
|        |      |                                                               |      |
| GJA1P1 | 1194 | AGCCTTTTGATTTCCCCGATGATAACCAGAATTCTAAAAAACTAGCTGCTGGACATGAAC  | 1253 |
| GJA1   | 1261 | TACAGCCACTAGCCATTGTGGACCAGCGACCTTCAAGCAGAGCCAGCAGTCGTGCCAGCA  | 1320 |
|        |      |                                                               |      |
| GJA1P1 | 1254 | TACAGCCACTAGCCATTGTGGACCAGCAACCTTCAAGCAGAGCCAGCAGTCGTGCCAGCA  | 1313 |
| GJA1   | 1321 | GCAGACCTCGGCCTGATGACCTGGAGATCTAGATACAGGCTTGAAAGCATCAAGATTCCA  | 1380 |
|        |      |                                                               |      |
| GJA1P1 | 1314 | GCAGGCCTCAGCCTGATGACCTGGAGATCTAGATACAGGCTTGAAAGTATCAAGATTTCCT | 1373 |
| GJA1   | 1381 | CTCAATTGTGGAGAAGAAAAAAGGTGCTGTAGAAAGTGACCCAGGTGTTAATTTTGATCC  | 1440 |
|        |      |                                                               |      |
| GJA1P1 | 1374 | CTCACTTGTGGAGAAGAAAAAAGGTGCTGTAGAAAGTGACCCAGGTGTTAATTTTGATCC  | 1433 |
| GJA1   | 1441 | GGTGGAGGTGGTACTCAACAGCCTTATTCATGAGGCTTAGAAAAACACAAAGACATTAGAA | 1500 |
|        |      |                                                               |      |
| GJA1P1 | 1434 | GGTGGAGGTGGTATTCAACAGTCTTATTCATGAGGCTTAGAAAAACACAAAGACATTAGAA | 1493 |
| GJA1   | 1501 | TACCTAGGTTCACTGGGGGTGTATGGGGTAGATGGGTGGAGAGGGAGGGGATAAGAGAGG  | 1560 |
|        |      |                                                               |      |
| GJA1P1 | 1494 | TACCTAGGTTCACTGGGGGTGTATGGGGTAGATGGGTGGAGAGGGAGGGGATAAGAGAGG  | 1553 |
| GJA1   | 1561 | TGCATGTTGGTATTTAAAGTAGTGGATTCAAAGAACTTAGATTATAAATAAGAGTTCCAT  | 1620 |
|        |      |                                                               |      |
| GJA1P1 | 1554 | TGCATATTGGTATTTAAAGTAGTGGATTCAAAAACTTAGATTATAAATAAGAGTTCCAT   | 1613 |
| GJA1   | 1621 | TAGGTGATACATAGATAAGGGCTTTTTCTCCCCGAAACACCCCTAAGAATGGTTCTGTG   | 1680 |
|        |      |                                                               |      |
| GJA1P1 | 1614 | TACATGATACATAGATTAGGGCTTTTTCTCCAGCAAAACACCCCTAAGAATGGTTCTGGG  | 1673 |
| GJA1   | 1681 | TATGTGAATGAGCGGGTGGTAATTGTGGCTAAATATTTTGTTTTACCAAGAACTGAAA    | 1740 |
|        |      |                                                               |      |
| GJA1P1 | 1674 | TATGTGAATGAGTGGGTGGTAATTGTGGCTAAATATTTTGTTTTACCAAGAACTGAAA    | 1733 |
| GJA1   | 1741 | TAATTCTGGCCAGGAATAAATACTTCCTGAACATCTTAGGTCTTTTCAACAAGAAAAAGA  | 1800 |
|        |      |                                                               |      |
| GJA1P1 | 1734 | TAATTCTGGCCAGGAATAAATACTTCCTGAACATCTTAGGTCTTTTCAACAAGAAAAAGA  | 1793 |
| GJA1   | 1801 | CAGAGGATTGTCTTTAAGTCCCTGCTAAAACATTCCATTGTTAAAAATTTGCACTTTGAAG | 1860 |
|        |      |                                                               |      |
| GJA1P1 | 1794 | CAGAGGATTGTCTTTAAGTCCCTGCTAAAACATTCCATTGTTAAAAATTTGCACTTTGAAG | 1853 |
| GJA1   | 1861 | GTAAGCTTTCTAGGCCTGACCCTCCAGGTGTCAATGGACTTGTGCTACTATATTTTTTTTA | 1920 |
|        |      |                                                               |      |
| GJA1P1 | 1854 | GTTAGCTTTCTAGGCCTGACCCTCCAGGTGTCAATGGACTTGTGCTACTATATTTTTTTTA | 1913 |

|        |      |                                                               |      |
|--------|------|---------------------------------------------------------------|------|
| GJA1   | 1921 | TTCTTGGTATCAGTTTAAAATTCAGACAAGGCCACAGAATAAGATTTTCCATGCATTTG   | 1980 |
| GJA1P1 | 1914 | TTCTTGGTATCAGTTTAAAATTCAGACAAGGCCACAGAATAAGATTTTCCATGCATTTG   | 1973 |
| GJA1   | 1981 | CAAAT-----ACGTATATTCTTTTTCCATCCACTTGCACAAATATCATTACCATC       | 2029 |
| GJA1P1 | 1974 | AAAATCTCAGCATTATACATATATT--TTTTCCATCCACTTGCACCATATCATTACCATC  | 2031 |
| GJA1   | 2030 | ACTTTTTTCATCATTCCTCAGCTACTACTCACATTCATTTAATGGTTTCTGTAAACATTTT | 2089 |
| GJA1P1 | 2032 | ACTTTTTTCATCATTCCTCAGCTACTACTCACATTCATTTAATGGTTTCTGTAAACATTTT | 2091 |
| GJA1   | 2090 | TAAGACAGTTGGGATGTCACTTAACATTTTTTTT---TTGAGCTAAAGTCAGGGAATCAA  | 2146 |
| GJA1P1 | 2092 | TAAGACAGTTGGGATGTCACTTAACATTTTTTTTCTTTTGAGCTAGAGTCAGGGAATCAA  | 2151 |
| GJA1   | 2147 | GCCATGCTTAATATTTAACAATCACTTATATGTGTGTCGAAGAGTTTGTGTTTGTTGTCA  | 2206 |
| GJA1P1 | 2152 | GCCATGCTTAATATTTAACAGTCACTTGTATGTGTGTGGAAG--TTTGTGTTTGTTGTCA  | 2209 |
| GJA1   | 2207 | TGTATTGGTACAAGCAGATACAGTATAAACTCACAAACACAGATTTGAAAAATAATGCACA | 2266 |
| GJA1P1 | 2210 | TGTATTGGTACAAGCAGATACAGTACAAACTCACAAACACAGATTTGAAAAATAATGCACA | 2269 |
| GJA1   | 2267 | TATGGTGTTCAAATTTGAACCTTTCTCATGGATTTTTGTGGTGTGGGCCAATATGGTGT   | 2326 |
| GJA1P1 | 2270 | TACAGTGTTCAAATTTGAACCTTTCTCATGGATTTTTGTGGTGTGGGCCAATACGGTGT   | 2329 |
| GJA1   | 2327 | TACATTATATAATTCCTGCTGTGGCAAGTAAAGCACACTTTTTTTTT-CTCCTAAAATGT  | 2385 |
| GJA1P1 | 2330 | TACATTATATAATTCCTGCTGTGGCAAGTAAACACACTTTTTTTTTTCTCCTAAAATGT   | 2389 |
| GJA1   | 2386 | TTTTCCCTGTGTATCCTATTATGGATACTGGTTTTGTTAATTATGATTCTTTATTTTCTC  | 2445 |
| GJA1P1 | 2390 | TTTTCCCCGTGTATCCTATTACGGATACTAGTTTTGTTAATTATGATTCTTTATTTTCTC  | 2449 |
| GJA1   | 2446 | TCCTTTTTTTTAGGATATAGCAGTAATGCTATTACTGAAATGAATTTCTTTTTCTGAAAT  | 2505 |
| GJA1P1 | 2450 | TCTTTTTTTTAGGATATAGCAGTAATGCTATTACTGAAATGAATTTCTTTCTCTGAAAT   | 2509 |
| GJA1   | 2506 | GTAATCATTGATGCTTGAATGATAGAATTTTAGTACTGTAAACAGGCTTTAGTCATTAAT  | 2565 |
| GJA1P1 | 2510 | GTAATCACTGATGCTTGAATGACAGAATTTTAGTACTGTAAACAGGCTTTAGTCATTAAT  | 2569 |
| GJA1   | 2566 | GTGAGAGACTTAGAAAAAATGCTTAGAGTGGA-----CTATTAAATGTGCCTAAATGAAT  | 2620 |
| GJA1P1 | 2570 | GTGAGAGACTTAGAAAAAATGCTTAGAGTGAGTGACTATTAAACGTGCCTAAATGAAT    | 2629 |
| GJA1   | 2621 | TTTGCAGTAACTGGTATTCTTGGGTTTTCC-TACTTAATACACAGTAATTCAGAACTTGT  | 2679 |
| GJA1P1 | 2630 | TTTGCAGTAACTGGTATTCTTGGGTTTGCCTACTTAATACACAGTAATTCAGAACTTGT   | 2689 |
| GJA1   | 2680 | ATTCTATTATGAGTTTAGCAGTCTTTTGGAGTGACCAGCAACTTTGATGTTTGCACTAAG  | 2739 |
| GJA1P1 | 2690 | ATTCT----GAGTTTAACAGTCTTTTGGAGTGACCAGCAACTTTGATGTTTGCACTAAG   | 2744 |
| GJA1   | 2740 | ATTTTATTTTGAATGCAAGAGAGGTTGAAAGAGGATTCAGTAGTACACATACAATAATT   | 2799 |
| GJA1P1 | 2745 | ATTTTATTTTGAATGCAAGAGAGGTTGAAAGAGGATTCAGTAGTACACATACAATAATT   | 2804 |
| GJA1   | 2800 | TATTTGAACTATATGTTGAAGACATCTACCAGTTTCTCCAAATGCCTTTTTTAAACTCA   | 2859 |
| GJA1P1 | 2805 | TATTTGAACTATATGCTGAAGACATCTACCAGTTTCTCCAAATGCCTTTTTTAAACTCA   | 2864 |
| GJA1   | 2860 | TCACAGAAGATTGGTGAAAATGCTGAGTATGACACTTTTCTTCTTGCATGCATGTCAGCT  | 2919 |
| GJA1P1 | 2865 | TCACAGACGACTGGTGAAAATGCTGAGTATGACACTTTTCTACTTGCATG----TCAGCT  | 2920 |

|        |      |                                                               |      |
|--------|------|---------------------------------------------------------------|------|
| GJA1   | 2920 | ACATAAACAGTTTTGTACAATGAAAATTACTAATTTGTTTGACATTCCATGTTAAACTAC  | 2979 |
|        |      |                                                               |      |
| GJA1P1 | 2921 | ACATAAACAGTTTTGTACAATGAAAATTACTAATTTGTTTGACATTCCATGTTAAACTAT  | 2980 |
| GJA1   | 2980 | GGTCATGTTTCAGCTTCATTGCATGTAATGTAGACCTAGTCCATCAGATCATGTGTTCTGG | 3039 |
|        |      |                                                               |      |
| GJA1P1 | 2981 | GGTCATGTTTCAGCTTCACTGCATGTAATGTAGACCTTGTCCATCAGATCATGTGTTCTGG | 3040 |
| GJA1   | 3040 | AGAGTGTTCTTTATTCAATAAAAGTTTTTAATTTAGTATAAACATA                | 3083 |
|        |      |                                                               |      |
| GJA1P1 | 3041 | AGAGTGTTCTTTATTCAATA--GTTTTAATTTAGCAT                         | 3075 |
