# Supplementary material for: Confirmation of Connexin45 Underlying Weak Gap Junctional Intercellular Coupling in HeLa Cells
Source: MDPI journal article supplement (doi:10.3390/biom10101389), 2020-09-29
Supplement: s1 [file s1]

**File S6. Potential off-target loci for gRNAs used in this study.** Potential off-target sites were found using Cas-OFFinder (<http://www.rgenome.net/cas-offinder/>), with following selections: SpCas9 and 5'-NRG-4' for the PAM type, 2 for mismatch number, and Homo sapiens (hg19) for the target genome. Lowercase letters denote mismatched residues.

| Target gene | gRNA-PAM sequence           | Found sequence               | Mismatches | Chromosome | Position (hg19) | Locus                                                       | On/Off-target |
|-------------|-----------------------------|------------------------------|------------|------------|-----------------|-------------------------------------------------------------|---------------|
| <i>GJB2</i> | CCTCCTTTGCAGCC<br>ACAACGNRG | CCTCCTTTGCAGCC<br>ACAACGAGG  | 0          | chr13      | 20763593        | <i>GJB2</i> , exon                                          | On-target     |
| <i>GJB2</i> | CCTCCTTTGCAGCC<br>ACAACGNRG | CCTCCTTTGCtGCCA<br>CAAgGTGG  | 2          | chr6       | 41659304        | <i>TFEB</i> , intron                                        | Off-target    |
| <i>GJB2</i> | CCTCCTTTGCAGCC<br>ACAACGNRG | CCTCCTTTGCAGCC<br>ACAAtCtTGG | 2          | chr5       | 149818830       | Intergenic<br>(between<br><i>CD74</i><br>and <i>RPS14</i> ) | Off-target    |
| <i>GJB5</i> | GGGCGCCTCTACCT<br>GAACCCNNG | GGGCGCCTCTACCT<br>GAACCCCGG  | 0          | chr1       | 35223270        | <i>GJB5</i> , exon                                          | On-target     |
| <i>GJB5</i> | GGGCGCCTCTACCT<br>GAACCCNNG | GGaCGCCTCTtCCTG<br>AACCCCTGG | 2          | chr6       | 106346458       | Intergenic<br>(between<br><i>PREP</i><br>and <i>PRDM1</i> ) | Off-target    |
| <i>GJA1</i> | TTTTCTCCGTGGGG<br>CGAGAGNRG | TTTTCTCCGTGGGG<br>CGAGAGAGG  | 0          | chr6       | 121768589       | <i>GJA1</i> , exon                                          | On-target     |
| <i>GJA1</i> | TTTTCTCCGTGGGG<br>CGAGAGNRG | TTTTCTCCaTGGGG<br>CaAGAGAGG  | 2          | chr5       | 108387542       | <i>FER</i> , intron                                         | Off-target    |
| <i>GJC1</i> | ATAGCCCAGGTACA<br>TCACAGNRG | ATAGCCCAGGTACA<br>TCACAGAGG  | 0          | chr17      | 42882903        | <i>GJC1</i> , exon                                          | On-target     |
