# Supplementary material for: Confirmation of Connexin45 Underlying Weak Gap Junctional Intercellular Coupling in HeLa Cells
Source: MDPI journal article supplement (doi:10.3390/biom10101389), 2020-09-29

**File S4.** Sequencing result of Cx43 RT-PCR product from HeLa cDNA. Cyan rectangle denotes one of the residues that discriminate *GJA1* and *GJA1P1*. Mixed signal of C (blue line) from *GJA1* and T (red line) from *GJA1P1* was shown in the rectangle.

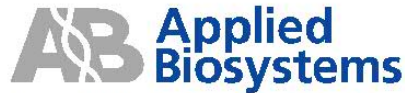

142620-BA-001-1-HeLa-Cx43-Cx43U1.ab1

KB 1.4.1.8 KB.bcp

142620-BA-001-1-HeLa-Cx43-Cx43U1

KB\_3730\_POP7\_BDTv3.mob

Signal: G:2982 A:3087 T:4425 C:3332 AvgSig: 3456

C#:16 W:A2 Plate Name:200723-27

TS:52 CRL:405 QV20+:400

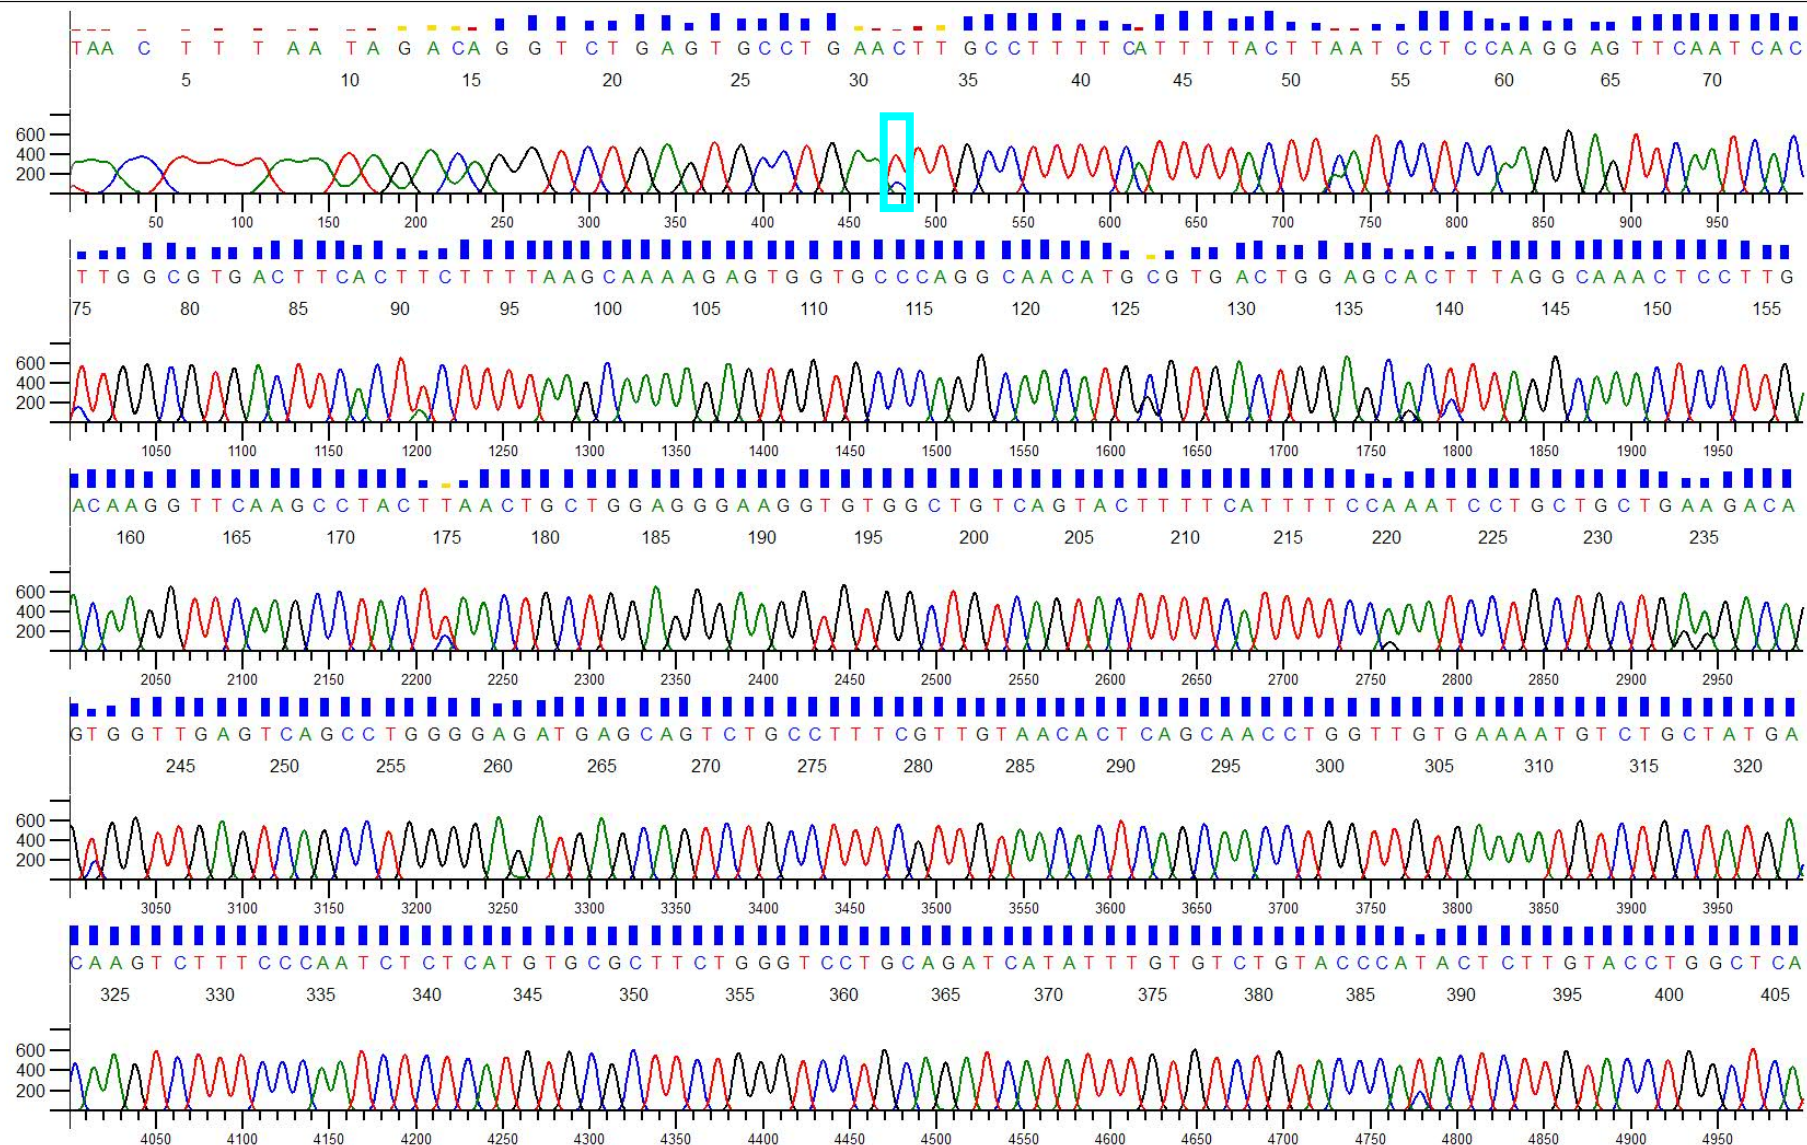

Inst Model/Name:3730xl/ABI3730-25197-003

Pure Base QVs: 1520

Printed on: 7월 24, 2020 08:54:08 KST

Sequence Scanner Software 2 v2.0

Mixed Base QVs: 10 16

Electropherogram Data Page 1 of 2

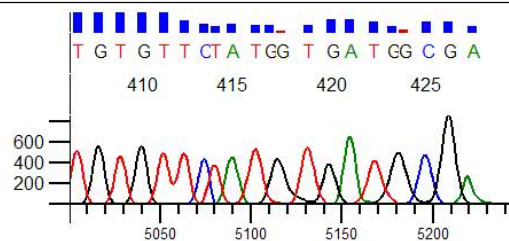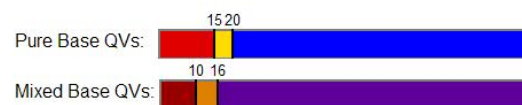

Supplement: s1 [file s1]
