# Supplementary material for: Confirmation of Connexin45 Underlying Weak Gap Junctional Intercellular Coupling in HeLa Cells
Source: MDPI journal article supplement (doi:10.3390/biom10101389), 2020-09-29

**File S3.** Sequencing result of Cx43 RT-PCR product from HEK293 cDNA. Cyan rectangle denotes one of the residues that discriminate *GJA1* and *GJA1P1*. Only C (blue line) peak from *GJA1* was detected.

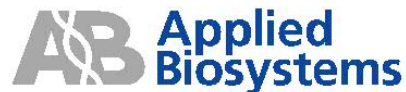

142620-BA-002-1-HEK293-Cx43-CX43U1.ab1

KB 1.4.1.8 KB.bcp

142620-BA-002-1-HEK293-Cx43-CX43U1

KB\_3730\_POP7\_BDTv3.mob

Signal: G:4377 A:4608 T:7658 C:5951 AvgSig: 5648

C#:14 W:B2 Plate Name:200723-27

TS:55 CRL:407 QV20+:419

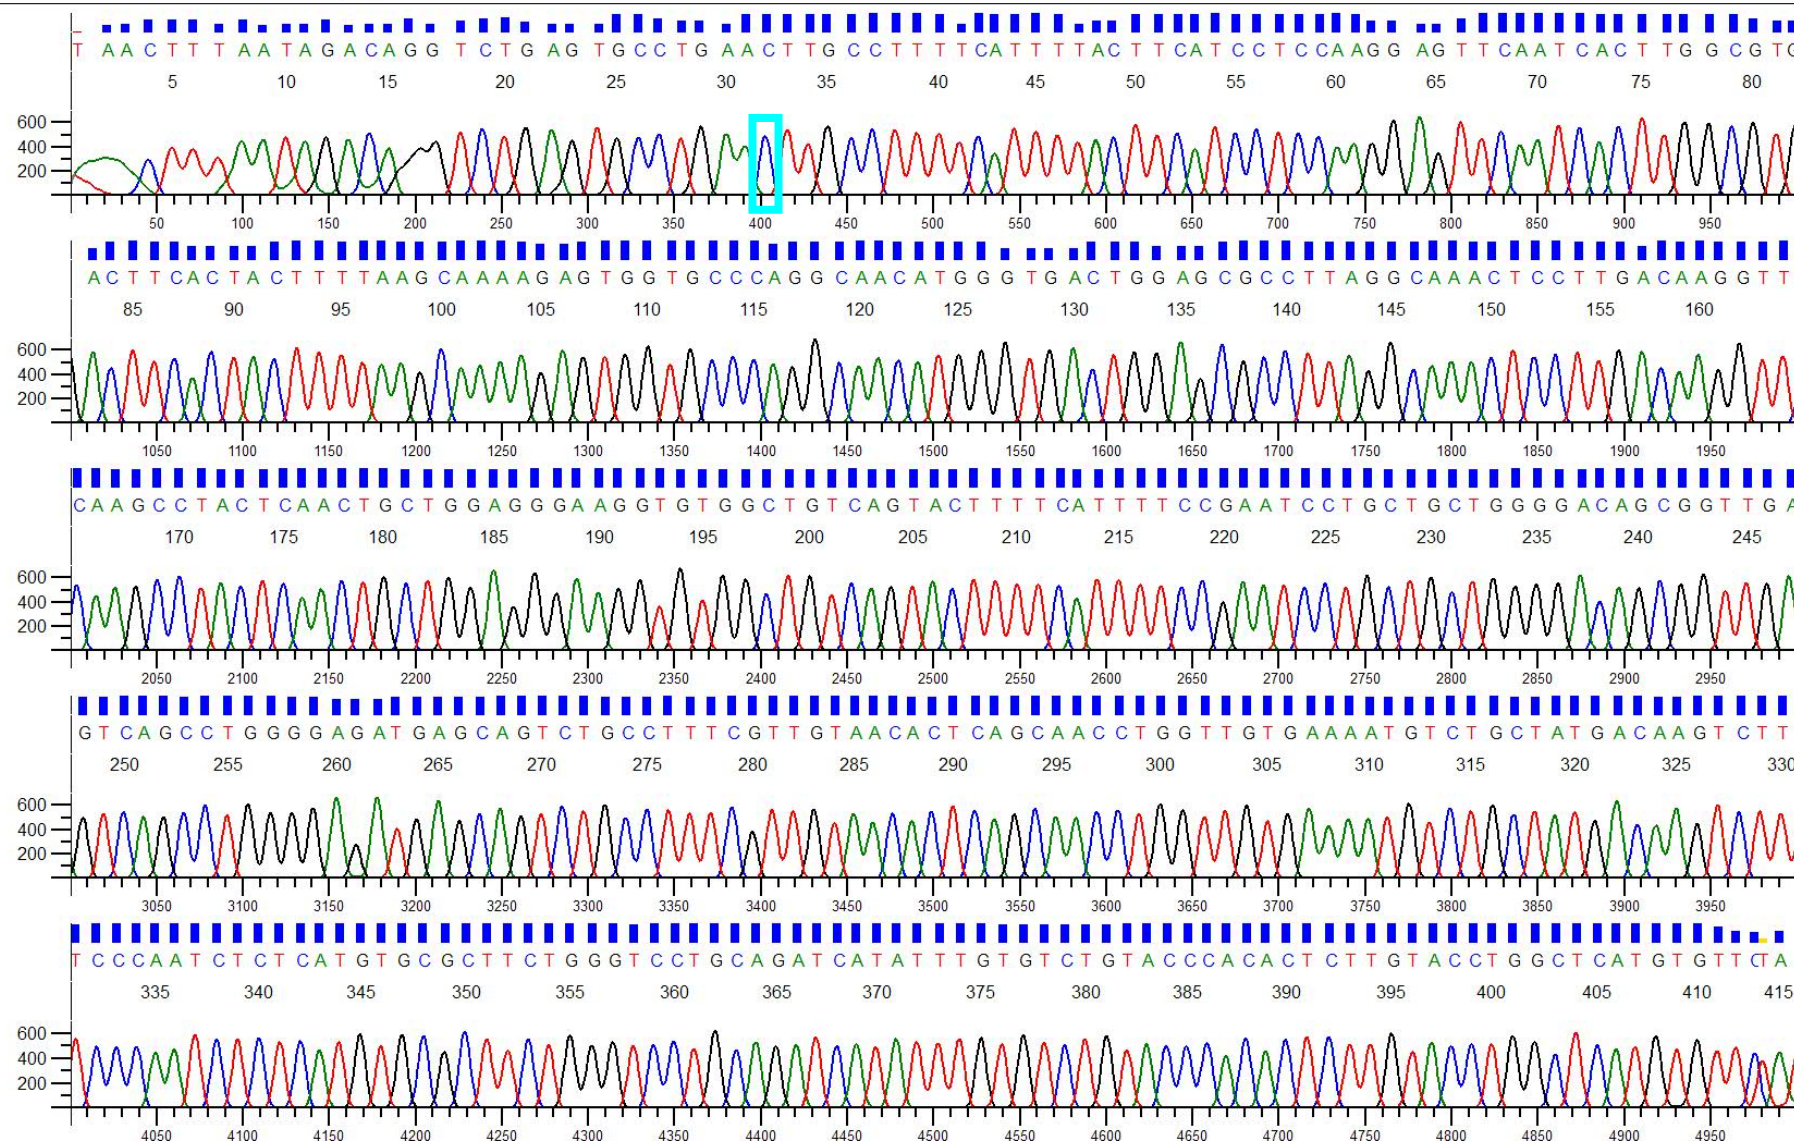

Inst Model/Name:3730xl/ABI3730-25197-003

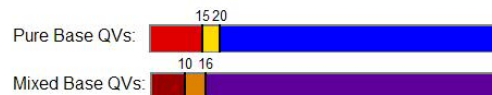

Printed on: 7월 24,2020 08:54:09 KST

Sequence Scanner Software 2 v2.0

Electropherogram Data Page 1 of 2

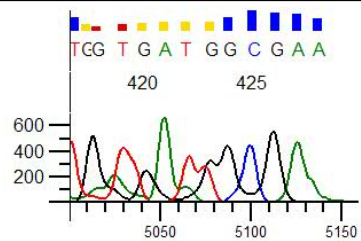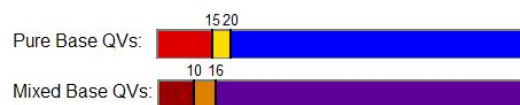

Supplement: s1 [file s1]
