# Supplementary figures and images for: Confirmation of Connexin45 Underlying Weak Gap Junctional Intercellular Coupling in HeLa Cells
Source: MDPI journal article supplement (doi:10.3390/biom10101389), 2020-09-29

**File S2. Phase contrast images of HeLa, A549, and their derivatives.**

**HeLa**

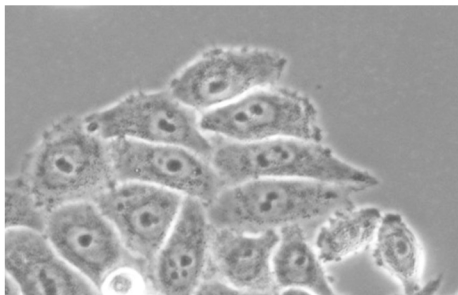

**HeLa-Cx45KO**

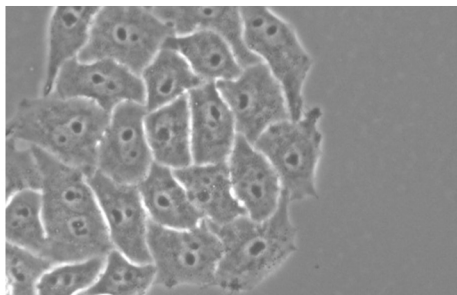

**A549**

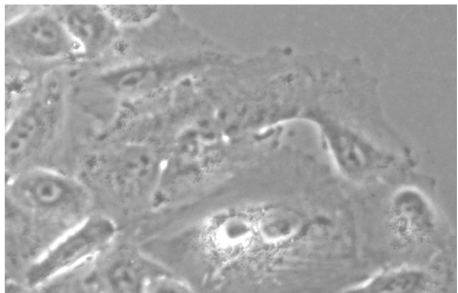

**A549-Cx43KO**

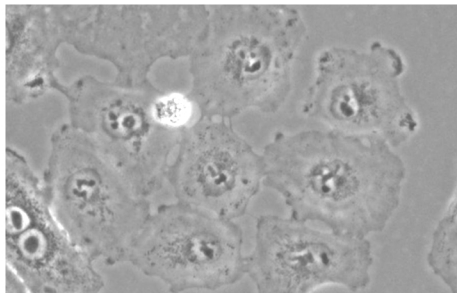

Supplement: s1 [file s1]
